# Supplementary material for: Alternative low-populated conformations prompt phase transitions in polyalanine repeat expansions
Source: Nat Commun. 2024 Mar 2;15:1925. doi: 10.1038/s41467-024-46236-5 (PMC10908835; doi:10.1038/s41467-024-46236-5)
Supplement: Supplementary file 4 — Source Data [file 41467_2024_46236_MOESM4_ESM.xlsx]

## Sheet: Figure 1D
Sequence		Dca-DCb		S2
G228
P229		0.127		0.351
G230		-0.199		0.371
G231				0.367
P232		0.081		0.405
G233		-0.171		0.461
G234		-0.149		0.522
E235				0.41
P236		0.152		0.346
G237		-0.093		0.352
K238		-0.097		0.498
G239		0.36		0.678
G240		0.566		0.793
A241		2.535		0.841
A242		3.465		0.858
A243		3.52		0.864
A244		3.686		0.865
A245		3.547		0.865
A246		3.648		0.865
A247		3.577		0.866
A248		3.606		0.866
A249		3.617		0.865
A250		3.432		0.864
A251		3.607		0.862
A252		3.613		0.86
A253		3.602		0.857
A254		3.569		0.852
A255		3.408		0.841
A256		3.239		0.817
A257		2.866		0.772
A258		2.298		0.676
A259		1.723		0.541
A260		0.85		0.375
G261		0.129		0.291
G262		0.205		0.227
L263		0.006		0.212
A264		0.103		0.198
A265		0.163		0.241
A266		-0.243		0.304
G267		-0.1		0.361
G268				0.355
P269		-0.081		0.345
G270		-0.085		0.318
Q271		-0.511		0.349
G272		0.006		0.393
W273		-0.033		0.48
A274				0.507
P275		-0.164		0.478
G276				0.458
P277		-0.122		0.419
G278				0.439
P279		-0.035		0.433
I280		-0.173		0.506
T281		-0.182		0.537
S282		0.129		0.62
I283				0.609
P284		-0.235		0.608
D285		0.011		0.412
S286		-0.116		0.357
L287		-0.211		0.32
G288		0.052		0.407
G289				0.411
P290		0.04		0.424
F291		-0.338		0.438
A292		-0.033		0.531
S293		-0.326		0.611
V294		-0.587		0.655
L295		0.096		0.408
S296		0.224		0.331
S297		0.003		0.31
L298		0.12		0.438
Q299		-0.58		0.429
R300				0.346
P301		-0.07		0.318
N302		-0.267		0.37
G303		-0.211		0.529
A304		-0.837		0.675
K305		-0.635		0.782
A306
A307
L308
V309
K310
S311
S312
M313
F314

## Sheet: Figure 1E
Sequence		R1	Error R1			R1rho	Error R1rho			hetNOEs	Error hetNOEs
G228
P229
G230		1.9102	0.44			3.8035	0.966			-0.181557	0.0249451
G231		1.9094	0.38			3.4006	0.856			-0.0179757	0.205958
P232
G233		2.0971	0.489			3.2766	0.435			0.144722	0.0309302
G234		2.1593	0.427			2.8409	0.445			0.303659	0.0266293
E235		2.2936	0.69			2.5676	0.547			0.313475	0.00974065
P236
G237										0.322036	0.158656
K238		2.3265	0.694			3.1889	0.577			0.484558	0.0133127
G239		2.2375	0.645			3.341	0.626			0.476027	0.0192285
G240		2.032	0.748			4.7402	0.84			0.536477	0.0148986
A241		1.8269	0.575			10.881	1.17			0.649993	0.0192393
A242		1.9212	0.511			12.818	1.07			0.629822	0.0160656
A243		1.5253	0.372			13.463	0.943			0.72722	0.00455603
A244		1.4712	0.305			14.021	0.942			0.726019	0.00340749
A245		1.5003	0.351			13.198	0.842			0.718782	0.00276926
A246		1.5329	0.335			12.807	0.846			0.703632	0.003128
A247		1.5561	0.398			12.817	0.861			0.722946	0.0050877
A248		1.3365	0.0993			10.763	1.14			0.663736	0.00886943
A249		1.5075	0.248			13.495	0.861			0.714494	0.00266473
A250		1.5192	0.365			13.278	0.857			0.722489	0.00297322
A251		1.5066	0.324			13.159	0.882			0.706136	0.00380093
A252		1.5216	0.294			13.437	0.928			0.706907	0.00543068
A253		1.4768	0.29			12.83	0.825			0.722686	0.00559038
A254		1.5626	0.387			13.134	0.791			0.705672	0.0109162
A255		1.3768	0.313			13.472	0.904			0.720873	0.0110117
A256		1.3169	0.244			13.6	0.939			0.744216	0.011462
A257		1.1963	0.0794			13.569	1.01			0.700489	0.0111615
A258		1.5125	0.298			11.565	0.873			0.597472	0.0105685
A259		1.5837	0.326			9.0369	0.753			0.633086	0.00851178
A260		1.6275	0.312			7.96	0.834			0.552119	0.00958023
G261		1.5504	0.117			5.4092	1.19			0.409351	0.0136176
G262		1.9949	0.355			5.082	0.501			0.389098	0.0120431
L263		1.6348	0.17			3.1478	0.618			0.333436	0.0160117
A264		1.3948	0.101			2.4836	1.11			0.358965	0.0194991
A265		1.9575	0.311			2.6613	0.743			0.279902	0.0151703
A266		1.8806	0.364			2.5738	0.567			0.313444	0.0143854
G267		1.9988	0.394			2.7669	0.607			0.198811	0.0248025
G268		2.0546	0.402			4.7021	1.1			0.234827	0.0184765
P269
G270		2.3148	0.651			2.843	0.782			0.255013	0.0213759
Q271		2.0366	0.363			2.5384	0.613			0.394332	0.0119105
G272		2.3822	0.533			2.6516	0.665			0.354616	0.0165353
W273		2.0832	0.341			2.5004	0.71			0.464479	0.00941736
A274		1.9376	0.325			2.7395	0.641			0.365828	0.0155001
P275
G276		1.8549	0.415			2.5369	0.612			0.210951	0.0241281
P277
G278		1.8609	0.374			2.622	0.711			0.330947	0.0173266
P279
I280		2.451	0.49			2.5676	0.547			0.365157	0.0192699
T281		2.2271	0.41			3.328	0.617			0.306453	0.0214494
S282		2.1657	0.431			2.9918	0.756			0.307973	0.018772
I283		1.929	0.389			2.6785	0.769			0.298382	0.0171585
P284
D285		1.6652	0.338			2.4051	0.827			0.463694	0.0222827
S286		1.923	0.211			2.5663	0.723			0.351305	0.0195434
L287		2.7408	0.455			2.4663	0.697			0.363217	0.0455742
G288		2.0359	0.577			3.1043	0.788			0.303684	0.0324872
G289		2.0339	0.372			2.677	0.539			0.232332	0.0244253
P290
F291		2.0578	0.354			2.4711	0.664			0.260417	0.0393478
A292		1.8734	0.105			2.9398	0.458			0.390369	0.0476929
S293		2.0604	0.516			2.901	0.95			0.228179	0.0568713
V294		1.7585	0.168			3.0667	1.09			0.174091	0.0996655
L295		1.4872	0.27			3.4723	1.57			0.0783354	0.163893
S296		2.574	0.611			3.6368	0.494			0.374526	0.0784977
S297		3.2166	0.806			4.4271	0.776			0.417404	0.0842311
L298		1.853	0.326			3.844	0.641			0.385535	0.114252
Q299		1.7834	0.126			3.4552	0.459			0.488332	0.0930619
R300						2.6152	0.596			0.338542	0.126473
P301
N302		3.1325	0.465			3.3688	0.651			0.522341	0.084127
G303			0				0
A304			0				0
K305		2.044	0.419				0			0.0430534	0.9243
A306		0	0				0			0.343827	0.372424
A307		0	0				0
L308		0	0				0
V309		0	0				0
K310		0	0				0
S311		0	0				0
S312		0	0
M313		0	0
F314		0	0
		0	0

## Sheet: Figure 2D
Sequence			I day 1		I day 8		I day 14
G228
P229
G230			1		0.817169		0.674064
G231			0.665866		0.560369		0.242924
P232					0
G233			0.78126		0.527117		0.383725
G234			0.499658		0.252181		0.186092
E235			0.758325		0.530533		0.373038
P236					0
G237			0.713778		-0.00345202		0.805541
K238					0.566656
G239			0.887898		0.649881		0.550278
G240			0.610597		0.309478		0.400421
A241			0.804034		0.1293		1
A242			0.354092		0.106502		0.884455
A243			0.371253		0.0802553		-0.00130669
A244			0.318336		0.0545842		-0.000265272
A245			0.284966		0.0803576		-0.0001037
A246			0.260522		0.0835613		0.000465471
A247			0.300319		0.0661604		0.000674936
A248			0.284582		0.0553854		-0.00216731
A249			0.282117		0.0523321		-6.37921e-05
A250			0.311547		0.0708981		4.29935e-05
A251			0.349475		0.0626635		0.000804063
A252			0.264975		0.104377		0.000420548
A253			0.279255		0.0750105		-0.000331784
A254			0.284257		0.0656114		-0.00123499
A255			0.287199		0.0485712		0.000274545
A256			0.28376		0.0608941		0.00392894
A257			0.276468		0.0423855		-0.000897779
A258			0.270251		0.0419637		0.00101126
A259			0.30551		0.0418105		-0.00131432
A260			0.337544		0.220802		-7.16231e-05
G261					0.100673
G262					0.0391635
L263			0.30911		0.258895		-0.00249336
A264			0.293348		0.072198		0.0641931
A265			0.205739		0.127535		-0.00189457
A266			0.35404		0.10214		-0.000936831
G267			0.143786		0.201345		-0.0100858
G268			0.181846		0		0.0120321
P269					0.196779
G270			0.552666		0.275221		0.0768577
Q271			0.677246		0.137101		0.0455119
G272			0.47888		0.171082		0.0537252
W273			0.49826		0.75382		0.0244535
A274			0.555746		0		0.010176
P275					0.271183
G276			0.605628		0		0.0926121
P277					0.570469
G278			0.777504		0		0.501042
P279					0.265266
I280			0.767646		0.200474		0.313493
T281					0.301931
S282					0.265576
I283			0.721891		0		0.0171697
P284					0.234446
D285			0.337086		0.236504		0.0198202
S286					0.420149
L287			0.801377		0.246797		0.000201197
G288			0.528019		0.29328		0.0277102
G289			0.434751		0		0.0716286
P290					0.0205648
F291					0.365823
A292			0.135299		0.4799		0.0456559
S293			0.1995		0.7032		0.0244739
V294			0.197129		0.599344		-0.000841342
L295					0.15132
S296			0.3788		0		0.17929
S297
L298					0.325278
Q299			0.693531		0		0.614431
R300			0.703182		0		0.118898
P301					0
N302					0
G303
A304			0.848151		0.316442		0.315026
K305			0.770269				0.0494783
A306
A307
L308
V309
K310
S311
S312
M313
F314

## Sheet: Figure 2E
Sequence		Dca-DCb 5deg		Dca-DCb 25C 1day		Dca-DCb 25C 14day
G228
P229		0.127		0.007		0.255
G230		-0.199		-0.037		0.189
G231				-0.154
P232		0.081		-0.112		0.184
G233		-0.171		-0.222
G234		-0.149		-0.056
E235				-0.175
P236		0.152		-0.103		0.13
G237		-0.093		-0.19		0.097
K238		-0.097		-0.961		-0.549
G239		0.36		-0.064		0.394
G240		0.566		0.011		0.125
A241		2.535		-0.222		-0.819
A242		3.465		2.559		0.193
A243		3.52		3.067		0.432
A244		3.686		3.122		0.421
A245		3.547		3.019		0.195
A246		3.648		2.987
A247		3.577		2.841
A248		3.606		2.917
A249		3.617		3.03		0.24
A250		3.432		2.459		0.376
A251		3.607		2.992
A252		3.613		2.893
A253		3.602		2.968
A254		3.569		2.909
A255		3.408		2.646
A256		3.239		2.479
A257		2.866		2.191
A258		2.298		1.72
A259		1.723		0.761
A260		0.85		0.232
G261		0.129		0.034		-0.031
G262		0.205		0.035		-0.05
L263		0.006		-0.696		-0.169
A264		0.103		-0.797		-0.251
A265		0.163		-0.139
A266		-0.243		-0.878
G267		-0.1		-0.117
G268				-0.11
P269		-0.081		-0.32		0.082
G270		-0.085		-0.156		0.171
Q271		-0.511		-0.785		-0.674
G272		0.006		0.002		0.337
W273		-0.033		-0.182		-0.251
A274				-0.25
P275		-0.164		-0.431		-0.271
G276				-0.277
P277		-0.122		-0.114		-0.026
G278				-0.192
P279		-0.035				-0.044
I280		-0.173		-0.473		0.055
T281		-0.182		-0.41		-0.394
S282		0.129		-0.078		0.163
I283				-0.39
P284		-0.235		-0.422		-0.087
D285		0.011		-0.289
S286		-0.116		-0.214		0.075
L287		-0.211		-0.632		-1.28
G288		0.052		0.027		0.162
G289				0.012
P290		0.04				0.337
F291		-0.338		-0.305		-0.314
A292		-0.033		-0.158		-0.171
S293		-0.326		-0.452
V294		-0.587		-0.512		-0.524
L295		0.096		-0.051		0.008
S296		0.224		-0.016		-1.037
S297		0.003
L298		0.12
Q299		-0.58		0.501
R300				-0.04
P301		-0.07
N302		-0.267
G303		-0.211		-0.24
A304		-0.837		-0.654
K305		-0.635		0.639
A306
A307
L308
V309						-1.272
K310
S311
S312
M313
F314

## Sheet: Figure 3A
Sequence XS20		Dca-DCb XS20		Sequence XS23		Dca-DCb XS23		Sequence XS26		Dca-DCb XS26
G228				G228				G228		0
P229		0.127		P229		0.219		P229		0.13
G230		-0.199		G230		0.011		G230		-0.019
G231				G231				G231
P232		0.081		P232		0.145		P232		0.068
G233		-0.171		G233		-0.147		G233		-0.095
G234		-0.149		G234		-0.141		G234		-0.149
E235				E235				E235
P236		0.152		P236		0.257		P236		0.254
G237		-0.093		G237		-0.092		G237		-0.095
K238		-0.097		K238		-0.057		K238		-0.043
G239		0.36		G239		0.303		G239		0.186
G240		0.566		G240				G240
A241		2.535		A241		2.046		A241		2.1
A242		3.465		A242		3.174		A242		3.394
A243		3.52		A243		3.488		A243		3.546
A244		3.686		A244		3.397		A244		3.564
A245		3.547		A245		3.414		A245		3.398
A246		3.648		A246		3.493		A246		3.444
A247		3.577		A247		3.295		A247		3.49
A248		3.606		A248		3.401		A248		3.527
A249		3.617		A249		3.405		A249		3.454
A250		3.432		A250		3.458		A250		3.361
A251		3.607		A251		3.454		A251		3.463
A252		3.613		A252		3.428		A252		3.435
A253		3.602		A253		3.484		A253		3.453
A254		3.569		A254		3.519		A254		3.425
A255		3.408		A255		3.48		A255		3.462
A256		3.239		A256		3.401		A256		3.453
A257		2.866		A257		3.318		A257		3.545
A258		2.298		A258		3.111		A258		3.555
A259		1.723		A259		2.905		A259		3.435
A260		0.85		A260		2.368		A260		3.371
G261		0.129		A261		1.981		A261		3.13
G262		0.205		A262		1.311		A262		2.909
L263		0.006		A263		0.711		A263		2.437
A264		0.103		G264		-0.28		A264		1.985
A265		0.163		G265		0.154		A265		1.07
A266		-0.243		L266		-0.331		A266		0.726
G267		-0.1		A267		0.032		G267		-0.186
G268				A268		0.267		G268		0.133
P269		-0.081		A269		-0.203		L269		-0.002
G270		-0.085		G270		-0.078		A270		0.058
Q271		-0.511		G271				A271		0.148
G272		0.006		P272		-0.019		A272		-0.178
W273		-0.033		G273		-0.075		G273		-0.099
A274				Q274		-0.37		G274
P275		-0.164		G275		0.054		P275		-0.044
G276				W276		0.014		G276		-0.075
P277		-0.122		A277				Q277		-0.452
G278				P278		-0.071		G278		0.06
P279		-0.035		G279				W279		-0.017
I280		-0.173		P280		0.156		A280
T281		-0.182		G281				P281		-0.112
S282		0.129		P282		0.348		G282
I283				I283		0.067		P283		0.069
P284		-0.235		T284		-0.047		G284
D285		0.011		S285		0.234		P285
S286		-0.116		I286				I286		0.215
L287		-0.211		P287		-0.087		T287		-0.029
G288		0.052		D288		0.184		S288		0.279
G289				S289		0.032		I289
P290		0.04		L290		-0.213		P290		-0.168
F291		-0.338		G291		-0.039		D291		0.093
A292		-0.033		G292				S292		-0.006
S293		-0.326		P293		0.449		L293		-0.151
V294		-0.587		F294		-0.238		G294		-0.126
L295		0.096		A295		0.246		G295
S296		0.224		S296		-0.269		P296		0.266
S297		0.003		V297		-0.404		F297		-0.223
L298		0.12		L298		0.468		A298		0.155
Q299		-0.58		S299				S299		-0.356
R300				S300		0.4		V300		-0.438
P301		-0.07		L301		0.185		L301		-0.571
N302		-0.267		Q302				S302
G303		-0.211		R303				S303		-0.309
A304		-0.837		P304				L304		0.169
K305		-0.635		N305				Q305
A306				G306		-0.171		R306
A307				A307		-0.657		P307
L308				K308				N308
V309				A309				G309
K310				A310				A310		-0.669
S311				L311				K311
S312				V312				A312
M313				K313				A313
F314				S314				L314
				S315				V315
				M316				K316
				F317				S317
								S318
								M319
								F320

## Sheet: Figure 3B
Sequence XS20		hetNOEs	Error hetNOEs			Sequence XS23		hetNOEs	Error hetNOEs			Sequence XS26		hetNOEs	Error hetNOEs
G228						G228						G228
P229						P229						P229
G230		-0.79597	0.022011			G230		-0.831681	0.0241109			G230		-0.659685	0.0797466
G231		-0.667032	0.0118056			G231		-0.654278	0.0122774			G231		-0.639831	0.031948
P232						P232						P232
G233		-0.495009	0.0328547			G233		-0.43144	0.0438371			G233		-0.355426	0.146414
G234		-0.164281	0.0282662			G234		0.0988472	0.0518402			G234		0.150452	0.0784738
E235		-0.0827675	0.0585078			E235		-0.0956471	0.187949			E235		-0.102527	0.148238
P236						P236						P236
G237		-0.0640829	0.236015			G237						G237
K238		0.130791	0.0628187			K238		0.0892274	0.160813			K238
G239		-0.349443	0.214466			G239		-0.229992	0.369045			G239		-0.843983	0.382648
G240		-0.132511	0.196412			G240		-0.130444	0.216373			G240
A241		0.32423	0.233282			A241						A241
A242		0.569845	0.0578399			A242		0.468395	0.0706372			A242		0.336235	0.351935
A243		0.51539	0.00532733			A243		0.555533	0.0101934			A243		0.329138	0.0273566
A244		0.712822	0.00277034			A244		0.627953	0.00264093			A244		0.677064	0.00248986
A245		0.574471	0.00235197			A245		0.607798	0.00359816			A245		0.667141	0.00367126
A246		0.638686	0.00501323			A246		0.657892	0.00657003			A246		0.65881	0.00492195
A247		0.685288	0.00651217			A247		0.639746	0.00854085			A247		0.705863	0.0109045
A248		0.561463	0.00951622			A248		0.592815	0.00915227			A248		0.722679	0.0120889
A249		0.642384	0.00218618			A249		0.736829	0.00210386			A249		0.705678	0.0164117
A250		0.670523	0.00281167			A250		0.691823	0.00291871			A250		0.723728	0.0151621
A251		0.642202	0.00395744			A251		0.701183	0.00373334			A251		0.591137	0.019883
A252		0.654909	0.00650684			A252		0.686737	0.00413113			A252		0.731015	0.00418122
A253		0.60904	0.00851941			A253		0.636658	0.00508891			A253		0.723888	0.00440318
A254		0.631151	0.00712299			A254		0.700288	0.00514492			A254		0.70005	0.00481688
A255		0.576873	0.00762739			A255		0.713797	0.00704135			A255		0.713485	0.00672986
A256		0.498853	0.00837363			A256		0.636956	0.00866398			A256		0.687976	0.00806388
A257		0.502004	0.00880714			A257		0.662701	0.00782203			A257		0.692485	0.0100995
A258		0.528721	0.00964283			A258		0.611735	0.00832442			A258		0.710823	0.0134347
A259		0.488311	0.0111025			A259		0.550468	0.00898275			A259		0.721575	0.0149505
A260		0.4016	0.0140264			A260		0.528057	0.00902372			A260		0.683021	0.0174117
G261						A261		0.548638	0.00975084			A261		0.615431	0.0185687
G262						A262		0.495193	0.0119528			A262		0.585784	0.0192876
L263		0.140969	0.0264831			A263		0.401418	0.0152284			A263		0.54869	0.0196862
A264		-0.0618962	0.144094			G264		0.241499	0.0308089			A264		0.530204	0.0202268
A265		-0.0679506	0.0814355			G265		-0.150469	0.082659			A265		0.481386	0.0231978
A266		-0.151981	0.0380973			L266		0.171416	0.0217964			A266		0.378383	0.0298605
G267		-0.187753	0.0465061			A267		-0.795349	0.0631003			G267		0.245727	0.0658095
G268		-0.166671	0.0345549			A268		-0.0629285	0.101767			G268		0.135241	0.116558
P269						A269		-0.137307	0.0469978			L269		0.149693	0.0472477
G270		-0.150372	0.0821437			G270		-0.188769	0.0478357			A270		0.00654944	0.88
Q271		-0.0940005	0.0844194			G271		-0.150469	0.082659			A271		-0.0252424	0.426829
G272		-0.0748019	0.180854			P272						A272		-0.107657	0.0997228
W273		0.0662049	0.0653525			G273		-0.120683	0.105897			G273		-0.216028	0.0896686
A274		0.0349437	0.162079			Q274		-0.0897375	0.0942172			G274		-0.123418	0.0966878
P275						G275		-0.0252707	0.554846			P275
G276		-0.0529674	0.102345			W276		0.0899634	0.0544468			G276		-0.248962	0.147279
P277						A277		-0.0461984	0.140785			Q277
G278		-0.691958	0.101597			P278						G278
P279						G279		-0.039458	0.157922			W279		0.102059	0.0949458
I280		-0.0816804	0.0585006			P280						A280		0.087337	0.127944
T281						G281						P281
S282						P282						G282		-0.0242004	0.479982
I283		0.10859	0.0451934			I283		-0.0956471	0.187949			P283
P284						T284		0.0645166	0.17376			G284		0.167991	0.393277
D285		0.130791	0.0628187			S285		0.115921	0.113614			P285
S286						I286		0.113611	0.057133			I286
L287		0.101566	0.144681			P287						T287		0.139814	0.178039
G288		-0.0162889	0.685524			D288		0.163699	0.0321217			S288		0.146055	0.215783
G289		-0.13115	0.0548691			S289		0.18099	0.133474			I289		0.141834	0.0748997
P290						L290						P290
F291		-0.0886583	0.313354			G291						D291		0.163781	0.0572276
A292		-0.179232	0.0833086			G292		-0.154027	0.0643789			S292		0.176223	0.245588
S293		-0.371839	0.0487743			P293						L293		0.0507445	0.740117
V294		-0.577649	0.065183			F294		0.15876	0.114951			G294
L295						A295		-0.272385	0.137104			G295		-0.105839	0.160873
S296		0.0897045	0.107405			S296		-0.373151	0.106791			P296
S297						V297		-0.648692	0.130488			F297		0.0656603	0.5053
L298						L298		-0.775628	0.0418339			A298
Q299		-0.0299249	0.62808			S299		0.132298	0.095336			S299		-0.297351	0.297699
R300		0.101566	0.144681			S300						V300
P301						L301		-1.11505	0.0146265			L301		-0.797231	0.115653
N302						Q302		0.184945	0.227314			S302		0.0940221	0.25065
G303						R303						S303
A304						P304						L304		-1.03081	0.0274726
K305		0.139546	0.042609			N305						Q305		0.333317	0.207074
A306						G306						R306
A307						A307						P307
L308						K308		-0.911804	0.0458874			N308
V309						A309		0.0943611	0.0551028			G309
K310						A310						A310		-1.54829	0.260685
S311						L311						K311		0.0829373	0.118952
S312						V312						A312
M313						K313						A313
F314						S314						L314
						S315						V315
						M316						K316
						F317						S317
												S318
												M319
												F320

## Sheet: Figure 3C
Lambda		XS20 25 deg	XS20 25deg refold		XS23 25deg	XS23 25deg refold		XS26 25deg	XS26 25deg refold
260		-0.0329449	-0.0238128		-0.0168443	-0.0777308		0.12619	-0.0998041
259.5		-0.0216802	-0.0220947		-0.0163099	-0.0803937		0.115762	-0.0882135
259		-0.0137309	-0.00974397		-0.0300792	-0.0821975		0.0914618	-0.104362
258.5		-0.0235448	0.000335564		-0.0530802	-0.122189		0.0599142	-0.116166
258		-0.055817	-0.00604555		-0.0778747	-0.116982		0.0570717	-0.107175
257.5		-0.0417321	-0.0209511		-0.0773586	-0.143425		0.0403604	-0.122771
257		-0.0185275	-0.0188806		-0.0837824	-0.200786		0.0527021	-0.114159
256.5		-0.0213224	-0.0387501		-0.108831	-0.225746		0.0735599	-0.115524
256		-0.0510416	-0.0493352		-0.0802464	-0.227775		0.101137	-0.122254
255.5		-0.0627809	-0.0779513		-0.0624742	-0.220205		0.125802	-0.134273
255		-0.0643826	-0.0911767		-0.0540279	-0.213888		0.133899	-0.139422
254.5		-0.0629475	-0.0978164		-0.0505567	-0.208404		0.118839	-0.142233
254		-0.0695681	-0.0967814		-0.0306971	-0.19265		0.114249	-0.114796
253.5		-0.0840518	-0.0879488		-0.0505541	-0.187476		0.100797	-0.137711
253		-0.0824405	-0.101554		-0.0691841	-0.187689		0.0771916	-0.158487
252.5		-0.0702855	-0.118169		-0.094178	-0.200054		0.0657183	-0.146605
252		-0.0652745	-0.121541		-0.136846	-0.22746		0.0328395	-0.133808
251.5		-0.0597322	-0.130848		-0.109923	-0.261424		0.0206737	-0.109311
251		-0.059449	-0.143984		-0.145832	-0.295979		0.0413319	-0.132334
250.5		-0.0547053	-0.153035		-0.142335	-0.300681		0.0314556	-0.14932
250		-0.0646949	-0.149789		-0.14582	-0.299952		0.0257081	-0.128206
249.5		-0.0539119	-0.123878		-0.136584	-0.338688		0.0144936	-0.158391
249		-0.0834176	-0.143524		-0.126666	-0.388422		0.000188581	-0.191637
248.5		-0.104681	-0.171872		-0.154277	-0.407048		0.00369829	-0.225317
248		-0.124937	-0.163029		-0.19588	-0.395564		0.00100947	-0.264346
247.5		-0.13726	-0.157119		-0.269585	-0.406941		-0.0241666	-0.284703
247		-0.158304	-0.177995		-0.273686	-0.455439		-0.0583172	-0.311889
246.5		-0.187206	-0.214423		-0.307467	-0.416821		-0.0809406	-0.347434
246		-0.224233	-0.246412		-0.32501	-0.394844		-0.0868765	-0.343026
245.5		-0.247898	-0.24162		-0.341634	-0.384793		-0.151913	-0.364158
245		-0.266799	-0.253173		-0.372404	-0.378232		-0.187491	-0.364508
244.5		-0.301806	-0.272987		-0.384805	-0.386588		-0.238504	-0.398535
244		-0.334355	-0.304343		-0.382683	-0.377146		-0.28465	-0.436672
243.5		-0.37391	-0.335706		-0.421223	-0.378688		-0.321094	-0.45792
243		-0.403419	-0.373976		-0.471458	-0.470943		-0.385555	-0.494872
242.5		-0.433943	-0.414155		-0.487	-0.463365		-0.432036	-0.548144
242		-0.487569	-0.449762		-0.550822	-0.482158		-0.459751	-0.612066
241.5		-0.517524	-0.519318		-0.565579	-0.575845		-0.526978	-0.690896
241		-0.553454	-0.578155		-0.596505	-0.644647		-0.611263	-0.716651
240.5		-0.612294	-0.648053		-0.699676	-0.786768		-0.686517	-0.778442
240		-0.674459	-0.728191		-0.863524	-0.799293		-0.788673	-0.846816
239.5		-0.77641	-0.809445		-0.942251	-0.859404		-0.884964	-0.919281
239		-0.85287	-0.89302		-1.05496	-0.936479		-1.03269	-0.978336
238.5		-0.924357	-0.983547		-1.19037	-1.04209		-1.19024	-1.02799
238		-1.04988	-1.07059		-1.32928	-1.07731		-1.33653	-1.11971
237.5		-1.18572	-1.19681		-1.4471	-1.11844		-1.5061	-1.23523
237		-1.31873	-1.30819		-1.58485	-1.21699		-1.70445	-1.35838
236.5		-1.44611	-1.42493		-1.64931	-1.38146		-1.91244	-1.47423
236		-1.55939	-1.58431		-1.792	-1.53501		-2.15542	-1.60407
235.5		-1.72904	-1.73737		-1.87579	-1.72095		-2.36781	-1.75215
235		-1.92022	-1.91161		-2.08904	-1.84551		-2.62677	-1.87727
234.5		-2.10134	-2.06963		-2.29652	-1.96335		-2.90562	-1.99264
234		-2.27446	-2.23626		-2.52277	-2.17711		-3.1899	-2.10583
233.5		-2.45947	-2.40602		-2.68886	-2.27801		-3.49674	-2.23511
233		-2.67721	-2.60287		-2.95501	-2.44133		-3.8263	-2.39059
232.5		-2.93585	-2.77112		-3.24553	-2.54792		-4.15851	-2.5294
232		-3.13892	-2.97814		-3.54143	-2.72936		-4.51797	-2.68848
231.5		-3.32633	-3.17189		-3.78573	-2.95757		-4.889	-2.87765
231		-3.55312	-3.38161		-3.96126	-3.07824		-5.26308	-3.09107
230.5		-3.78017	-3.61082		-4.28931	-3.24293		-5.62505	-3.26263
230		-4.0326	-3.85575		-4.59255	-3.42672		-6.01426	-3.44989
229.5		-4.25245	-4.12193		-4.83098	-3.57963		-6.41883	-3.6279
229		-4.46903	-4.34607		-5.05834	-3.76758		-6.79839	-3.79508
228.5		-4.69001	-4.58383		-5.31723	-3.89456		-7.21089	-3.96271
228		-4.89076	-4.82153		-5.57004	-4.03825		-7.5653	-4.11181
227.5		-5.08889	-5.02885		-5.83926	-4.16785		-7.89225	-4.25368
227		-5.28707	-5.21833		-6.09467	-4.29346		-8.23192	-4.38044
226.5		-5.42083	-5.39658		-6.2995	-4.46665		-8.52388	-4.52144
226		-5.59667	-5.55235		-6.53751	-4.62521		-8.77998	-4.66129
225.5		-5.7453	-5.68969		-6.72675	-4.77868		-9.01331	-4.7822
225		-5.90689	-5.82676		-6.88604	-4.9102		-9.22298	-4.88477
224.5		-6.05015	-5.96426		-6.97911	-5.00614		-9.43361	-4.95919
224		-6.17446	-6.04228		-7.10018	-5.13324		-9.56843	-5.08024
223.5		-6.25004	-6.13187		-7.18822	-5.24818		-9.71598	-5.18687
223		-6.37924	-6.20387		-7.31022	-5.34691		-9.81105	-5.23119
222.5		-6.45168	-6.25294		-7.39454	-5.4589		-9.9088	-5.29589
222		-6.5063	-6.30588		-7.5452	-5.48589		-9.99614	-5.37031
221.5		-6.59103	-6.31282		-7.67629	-5.56004		-10.0377	-5.48725
221		-6.60557	-6.34534		-7.71231	-5.79248		-10.0499	-5.5469
220.5		-6.59661	-6.40657		-7.77281	-5.85322		-10.096	-5.53077
220		-6.56952	-6.44741		-7.83033	-5.93093		-10.0852	-5.56798
219.5		-6.55878	-6.49315		-7.80897	-5.87904		-10.1045	-5.63153
219		-6.55838	-6.58455		-7.73142	-5.80525		-10.0451	-5.65793
218.5		-6.5177	-6.63954		-7.65479	-5.90156		-9.98979	-5.60433
218		-6.52249	-6.67407		-7.61366	-5.9128		-9.98874	-5.60704
217.5		-6.61423	-6.63263		-7.61585	-5.85103		-10.0025	-5.62337
217		-6.60828	-6.63729		-7.56663	-5.90071		-10.007	-5.62856
216.5		-6.64446	-6.63878		-7.54513	-5.8288		-9.97433	-5.6006
216		-6.74628	-6.62381		-7.65366	-5.93923		-9.98996	-5.48438
215.5		-6.79485	-6.59106		-7.73301	-5.94354		-10.02	-5.3821
215		-6.80516	-6.57913		-7.75397	-5.88227		-10.0284	-5.29668
214.5		-6.75959	-6.66918		-7.91657	-5.95699		-9.98794	-5.14018
214		-6.79849	-6.74066		-8.02889	-6.02246		-9.94594	-5.04878
213.5		-6.8998	-6.8577		-8.16409	-5.90663		-10.0263	-4.95688
213		-6.95631	-6.9036		-8.31409	-6.01778		-10.1214	-4.87661
212.5		-6.99005	-7.03737		-8.45008	-6.11425		-10.297	-4.77553
212		-7.16205	-7.21215		-8.47032	-6.14068		-10.3914	-4.71955
211.5		-7.36515	-7.44462		-8.62357	-5.92608		-10.578	-4.59338
211		-7.63539	-7.59934		-8.54721	-5.86086		-10.8181	-4.44977
210.5		-7.95305	-7.8672		-8.86392	-5.79033		-11.0874	-4.26177
210		-8.12836	-8.01197		-8.95918	-5.6974		-11.2865	-4.09073
209.5		-8.40253	-8.19894		-8.96529	-5.52856		-11.4303	-3.93578
209		-8.58914	-8.40643		-9.04483	-5.29719		-11.5761	-3.80684
208.5		-8.79389	-8.50144		-9.34389	-5.21167		-11.6876	-3.53134
208		-9.0869	-8.60034		-9.38668	-5.05336		-11.8354	-3.28678
207.5		-9.21997	-8.80935		-9.45236	-4.639		-11.8946	-3.05985
207		-9.36398	-8.86827		-9.27603	-4.27557		-11.8636	-2.77786
206.5		-9.39121	-8.93013		-9.38423	-3.83702		-11.9027	-2.43142
206		-9.37423	-8.88377		-9.47764	-3.56339		-11.5826	-2.08519
205.5		-9.38084	-8.97012		-9.33023	-3.20711		-11.3288	-1.63121
205		-9.26052	-8.80334		-9.03594	-2.92003		-11.2873	-1.27705
204.5		-8.9648	-8.54139		-8.7863	-2.5947		-10.8925	-0.855947
204		-8.79194	-8.1918		-8.39622	-2.29425		-10.6698	-0.224156
203.5		-8.62979	-8.24745		-8.03174	-1.63028		-10.0513	0.383744
203		-8.58696	-8.0201		-7.83822	-1.20393		-9.35936	0.91325
202.5		-8.12337	-7.56702		-7.22152	-0.40704		-8.81084	1.37841
202		-7.80362	-7.04689		-6.51471	0.31801		-8.1653	1.72626
201.5		-7.47928	-6.83229		-6.25742	1.06675		-7.24972	2.08399
201		-7.26836	-6.3379		-5.16662	2.51561		-6.54143	2.67574
200.5		-6.56102	-5.70499		-4.87251	4.37245		-5.14623	3.19973
200		-5.83558	-4.46411		-2.86508	4.71145		-4.13653	3.72561
199.5		-4.86194	-3.79052		-1.5436	4.55492		-2.81468	4.2401
199		-4.19796	-2.964		-1.61219	4.59478		-1.92778	4.82034
198.5		-3.23908	-1.98836		-0.991734	5.71871		-0.4974	5.66097
198		-2.08951	-0.976248		0.440587	8.71339		0.712616	6.3082
197.5		-1.55235	-0.595798		0.452896	9.1998		1.82005	6.27105
197		-0.972252	-0.143159		1.07457	10.909		1.64141	6.89085
196.5		0.0303426	0.854522		2.99549	9.9657		3.10867	7.45999
196		0.960359	1.63223		0.864917	10.4903		4.64801	7.83085
195.5		2.21842	2.42925		1.78749	13.0766		7.33722	7.99175
195		2.15513	2.91061		2.6419	11.0642		7.73902	7.72276
194.5		2.44534	2.94667		2.86611	10.9677		9.45664	7.83075
194		4.4917	4.33447		0.595773	12.7871		10.5307	7.89189
193.5		5.76315	5.86608		2.8492	10.8488		11.2648	7.61758
193		5.5965	5.69197		5.90075	13.384		10.2756	7.829
192.5		6.10226	6.59612		6.49723	13.2166		10.933	8.08517
192		6.08223	7.86396		6.503	8.18757		9.65263	8.47385
191.5		7.19546	8.04885		4.29688	9.75096		8.66108	8.65302
191		7.76027	7.96974		7.39215	9.39955		7.43481	9.10782
190.5		7.3059	7.67941		7.00644	3.38723		6.37161	8.40974
190		7.10062	7.57981		5.19771	2.9594		6.74452	8.03755

## Sheet: Figure 4B
Sequence XS26		Dca-DCb fresh XS26		Dca-DCb incubated XS26
G228		0
P229		0.13		0.135
G230		-0.019		-0.069
G231
P232		0.068		0.051
G233		-0.095		-0.163
G234		-0.149		-0.129
E235				-0.118
P236		0.254		-0.078
G237		-0.095		-0.148
K238		-0.043		-0.534
G239		0.186		-0.005
G240				-0.225
A241		2.1
A242		3.394
A243		3.546
A244		3.564
A245		3.398
A246		3.444
A247		3.49
A248		3.527
A249		3.454
A250		3.361
A251		3.463
A252		3.435
A253		3.453
A254		3.425
A255		3.462
A256		3.453
A257		3.545
A258		3.555
A259		3.435
A260		3.371
A261		3.13
A262		2.909
A263		2.437
A264		1.985
A265		1.07
A266		0.726
G267		-0.186		-0.375
G268		0.133
L269		-0.002		-0.258
A270		0.058
A271		0.148		-0.063
A272		-0.178
G273		-0.099		-0.167
G274
P275		-0.044		-0.096
G276		-0.075		-0.096
Q277		-0.452		-0.36
G278		0.06		0.056
W279		-0.017		0.053
A280				-0.185
P281		-0.112		-0.232
G282				-0.18
P283		0.069		0.026
G284
P285				-0.038
I286		0.215		0.153
T287		-0.029		-0.045
S288		0.279		0.091
I289
P290		-0.168		-0.241
D291		0.093		0.32
S292		-0.006
L293		-0.151
G294		-0.126		-0.09
G295
P296		0.266		-0.197
F297		-0.223		-0.642
A298		0.155
S299		-0.356
V300		-0.438		-0.487
L301		-0.571		-0.067
S302
S303		-0.309		-0.439
L304		0.169
Q305
R306
P307
N308				-0.579
G309				-0.163
A310		-0.669		-0.566
K311
A312
A313
L314
V315				-0.005
K316				0.523
S317
S318
M319
F320
Ala1				-0.261
Ala2				-0.395
Ala3
Ala4
Ala5
Ala6				-0.084
Ala7				-0.114
Ala8				-0.233
Ala9				-0.669
Ala10				-0.164
Ala11				-0.35
Ala12				-0.24
Ala13				-0.372
Ala14				-0.394
Ala15				-0.459
Ala16				-0.273
Ala17				-0.033
Ala18
Ala19
Ala20
Ala21
Ala22

## Sheet: Figure 4D
Sequence XS26			I/I0 incubated XS26
G228
P229			0.744611
G230			0.814983
G231
P232			0.569725
G233			0.154158
G234			0.803222
E235
P236			0.987968
G237			0.322892
K238
G239
G240
A241
A242			0.280917
A243			0.466309
A244			0.93
A245			0.374974
A246			0.299858
A247			0.270839
A248			0.618321
A249			0.26672
A250			0.579545
A251			0.266644
A252			0.383173
A253			0.292181
A254			0.256026
A255			0.312872
A256			0.514671
A257			0.558234
A258			0.27254
A259			0.380188
A260			0.325401
A261			0.270598
A262			0.489331
A263			0.352203
A264			0.273487
A265			0.426074
A266			0.348579
G267
G268			0.989358
L269
A270			0.467931
A271			0.293807
A272			0.293219
G273			0.46551
G274
P275			0.499506
G276			0.592666
Q277			1
G278			1.24393
W279			1.29836
A280
P281			1.17975
G282
P283			1.35174
G284
P285
I286			1.38181
T287			1.0819
S288			1.19269
I289
P290			0.707093
D291			0.631453
S292			0.735193
L293			0.570497
G294			0.625074
G295
P296			0.357396
F297
A298			1.63347
S299
V300			0.609308
L301
S302
S303
L304
Q305
R306			0
P307			0
N308			0
G309			0
A310			0
K311			0
A312			0
A313			0
L314			0
V315			0
K316
S317
S318
M319
F320
Ala1			2.43899
Ala2			1.51239
Ala3			4.47258
Ala4
Ala5
Ala6
Ala7			9.77044
Ala8
Ala9			11.8344
Ala10			19.5084
Ala11			2.19217
Ala12			1.45988
Ala13			2.665
Ala14			1.58022
Ala15			1.71443
Ala16
Ala17
Ala18			2.32634
Ala19			14.278
Ala20			0.593926
Ala21			0.309883
Ala22			0.544461

## Sheet: Figure 5A
Incubation time (min)			XS20	XS20 SD			XS23	XS23 SD			XS26	XS26 SD
10			0.136333	0.00602771			0.11	0.00754983			0.111667	0.0215019
20			0.132667	0.0083865			0.103333	0.0085049			0.105333	0.0185831
30			0.132667	0.010116			0.098	0.008544			0.127333	0.0136504
40			0.132	0.01			0.098	0.0043589			0.238333	0.0386566
50			0.121333	0.00814453			0.096	0.00458258			0.425333	0.0165025
60			0.125	0.00608276			0.0983333	0.00450925			0.525	0.0101489
70			0.127667	0.00723418			0.0893333	0.00404145			0.57	0.010583
80			0.123667	0.00950439			0.099	0.006			0.598333	0.00950439
90			0.123667	0.00832666			0.0913333	0.00378594			0.612	0.00556776
100			0.115	0.0072111			0.0946667	0.00650641			0.626667	0.00472582
110			0.116	0.008544			0.0943333	0.00602771			0.631	0.003
120			0.114333	0.0106927			0.0916667	0.00404145			0.631333	0.00665833
130			0.111	0.00781025			0.0973333	0.00550757			0.637667	0.00472582
140			0.113	0.00953939			0.0943333	0.00404145			0.637	0.005
150			0.120667	0.00737112			0.0946667	0.00321455			0.64	0.00360555
160			0.116667	0.00814453			0.0943333	0.00288675			0.645333	0.0023094
170			0.118	0.0052915			0.0943333	0.00635085			0.646333	0.0011547
180			0.112667	0.00378594			0.0953333	0.00472582			0.652667	0.00351189
190			0.115333	0.00450925			0.093	0.0043589			0.652333	0.00208167
200			0.11	0.00360555			0.091	0.00556776			0.653333	0.00208167
210			0.103333	0.00057735			0.091	0.007			0.651667	0.00550757
220			0.101	0.00360555			0.0956667	0.00873689			0.658	0.002
230			0.106	0.00818535			0.0906667	0.00702377			0.660333	0.0061101
240			0.111	0.00793725			0.087	0.0043589			0.658667	0.0011547
250			0.11	0.0072111			0.0903333	0.00723418			0.658333	0.00378594
260			0.112	0.008			0.0846667	0.0070946			0.661333	0.00351189
270			0.109333	0.0051316			0.088	0.00754983			0.663333	0.00351189
280			0.106	0.00458258			0.089	0.008544			0.668333	0.00288675
290			0.106667	0.00351189			0.093	0.00888819			0.663333	0.00378594
300			0.107	0.0043589			0.0953333	0.00929157			0.665667	0.00416333
310			0.103333	0.00665833			0.091	0.00953939			0.664333	0.00450925
320			0.104	0.003			0.0926667	0.00750555			0.668	0.00608276
330			0.102	0.00458258			0.092	0.008544			0.666	0.0034641
340			0.099667	0.00305505			0.0906667	0.00665833			0.668	0.0043589
350			0.1	0.00458258			0.093	0.0072111			0.665667	0.00550757
360			0.101667	0.00251661			0.0943333	0.0080829			0.668333	0.00152753
370			0.097667	0.00568624			0.091	0.00556776			0.668333	0.0064291
380			0.092667	0.00416333			0.094	0.00754983			0.671667	0.00472582
390			0.094	0.00754983			0.0963333	0.0112398			0.672667	0.00665833
400			0.093667	0.00416333			0.098	0.01253			0.673667	0.00208167
410			0.092667	0.00321455			0.0986667	0.0110151			0.672667	0.00416333
420			0.095	0.001			0.0953333	0.0110604			0.674333	0.00378594
430			0.103333	0.00568624			0.092	0.00953939			0.676	0.00608276
440			0.101667	0.00305505			0.0913333	0.0064291			0.675	0.00519615
450			0.097333	0.00416333			0.0933333	0.00635085			0.675667	0.00450925
460			0.098	0.002			0.099	0.00818535			0.679667	0.00288675
470			0.099667	0.00404145			0.0946667	0.00702377			0.675667	0.0057735
480			0.097667	0.00208167			0.0933333	0.0085049			0.682333	0.00723418
490			0.100333	0.00404145			0.0946667	0.00862168			0.678	0.00519615
500			0.091333	0.00305505			0.092	0.00888819			0.680333	0.00472582
510			0.098333	0.00305505			0.0973333	0.00763763			0.682	0.00655744
520			0.096333	0.00057735			0.0903333	0.00665833			0.681667	0.00702377
530			0.095667	0.00404145			0.0873333	0.00763763			0.679	0.00264575
540			0.090333	0.0011547			0.0876667	0.00757188			0.683333	0.00493288
550			0.098	0.00173205			0.089	0.00888819			0.682	0.004
560			0.098	0.001			0.091	0.0104403			0.684333	0.00152753
570			0.093667	0.0023094			0.0906667	0.00602771			0.687333	0.00351189
580			0.093333	0.00208167			0.088	0.00519615			0.687	0.002
590			0.095333	0.00416333			0.0893333	0.00472582			0.686	0.00264575
600			0.095333	0.00152753			0.0913333	0.00873689			0.686	0.00458258
610			0.092333	0.00208167			0.0936667	0.0102632			0.688333	0.00321455
620			0.090667	0.00152753			0.0933333	0.0090185			0.688	0.006245
630			0.092667	0.00208167			0.0896667	0.00416333			0.688667	0.00472582
640			0.095667	0.00305505			0.0893333	0.00351189			0.692667	0.00568624
650			0.092333	0.00208167			0.0956667	0.00971253			0.688333	0.00351189
660			0.091	0.005			0.100667	0.010504			0.692333	0.00665833
670			0.093667	0.00288675			0.0883333	0.00378594			0.691333	0.00550757
680			0.093333	0.00251661			0.0956667	0.00757188			0.689	0.00458258
690			0.089667	0.00251661			0.095	0.008544			0.692	0.006
700			0.089667	0.00057735			0.092	0.008544			0.690333	0.00763763
710			0.09	0.002			0.0916667	0.0080829			0.691333	0.00750555
720			0.091667	0.00208167			0.0876667	0.00251661			0.693333	0.00585947
730			0.092333	0.0011547			0.0916667	0.00929157			0.694667	0.00832666
740			0.091667	0.00152753			0.0876667	0.00950439			0.691333	0.00321455
750			0.091333	0.00152753			0.095	0.00754983			0.692	0.0034641
760			0.092	0.00360555			0.0943333	0.0070946			0.695667	0.00602771
770			0.095	0.00173205			0.0886667	0.0090185			0.69	0.0043589
780			0.095	0.00173205			0.0963333	0.0115902			0.694667	0.00450925
790			0.092	0.00458258			0.0893333	0.00635085			0.692667	0.00251661
800			0.091667	0.00251661			0.0916667	0.00585947			0.694667	0.0051316
810			0.090333	0.00288675			0.100333	0.0115902			0.695	0.00264575
820			0.091333	0.0057735			0.0943333	0.0126623			0.697	0.002
830			0.090333	0.00321455			0.0966667	0.0132035			0.696667	0.00378594
840			0.092667	0.00152753			0.100667	0.0080829			0.693667	0.00493288
850			0.093	0.006			0.094	0.00556776			0.696	0.005
860			0.091667	0.00665833			0.0946667	0.00950439			0.696667	0.00351189
870			0.090667	0.00472582			0.095	0.0104403			0.697333	0.0051316
880			0.091	0.00360555			0.097	0.0111355			0.697333	0.00305505
890			0.096333	0.0064291			0.093	0.00916515			0.696667	0.00305505
900			0.091333	0.00152753			0.094	0.007			0.698667	0.00251661
910			0.091667	0.00152753			0.093	0.00964365			0.696	0.00360555
920			0.088	0.001			0.0906667	0.00702377			0.697	0.00264575
930			0.091333	0.00152753			0.0916667	0.00585947			0.7	0.0034641
940			0.093333	0.00503322			0.0916667	0.0085049			0.695333	0.00450925
950			0.092	0.00360555			0.0966667	0.00802081			0.698667	0.00378594
960			0.094	0.00655744			0.0916667	0.00585947			0.697333	0.0051316
970			0.096	0.0034641			0.0886667	0.00585947			0.702667	0.00251661
980			0.089667	0.00208167			0.0893333	0.00896289			0.701333	0.00493288
990			0.092667	0.00321455			0.098	0.00953939			0.698667	0.00680686
1000			0.089	0.001			0.100333	0.0120139			0.702	0.00360555
1010			0.092667	0.00251661			0.0906667	0.0102632			0.699333	0.00208167
1020			0.095333	0.00251661			0.089	0.008			0.699	0.004
1030			0.092333	0.0023094			0.0953333	0.0145717			0.702333	0.0080829
1040			0.091333	0.00493288			0.096	0.00953939			0.701333	0.0051316
1050			0.092333	0.00152753			0.0936667	0.0126623			0.702667	0.00550757
1060			0.099667	0.00321455			0.0943333	0.0105987			0.705	0.00360555
1070			0.091	0.001			0.098	0.012			0.702	0.0034641
1080			0.092333	0.00351189			0.0926667	0.00907377			0.701667	0.00802081
1090			0.090333	0.00251661			0.0933333	0.0120554			0.703	0.00173205
1100			0.092	0.0043589			0.094	0.007			0.702333	0.00351189
1110			0.092333	0.00404145			0.0943333	0.00602771			0.703333	0.00208167
1120			0.093333	0.00493288			0.095	0.00964365			0.704667	0.00251661
1130			0.090667	0.0011547			0.0896667	0.00493288			0.704	0.0052915
1140			0.092333	0.00152753			0.0916667	0.00585947			0.705667	0.00763763
1150			0.089667	0.00057735			0.106333	0.0150111			0.707	0.006
1160			0.09	0.00264575			0.097	0.00754983			0.702667	0.00550757
1170			0.092333	0.00404145			0.088	0.007			0.708	0.003
1180			0.089	0.00360555			0.0976667	0.00862168			0.706333	0.00208167
1190			0.094333	0.00404145			0.096	0.00888819			0.706333	0.00503322
1200			0.092667	0.00057735			0.0933333	0.0110151			0.71	0.00458258
1210			0.090667	0.00404145			0.0893333	0.00550757			0.708667	0.00802081
1220			0.097	0.003			0.1	0.0145258			0.707	0.00458258
1230			0.092333	0.00288675			0.0953333	0.0113725			0.709333	0.00152753
1240			0.092	0.004			0.0953333	0.00750555			0.708667	0.00550757
1250			0.093333	0.00404145			0.0943333	0.00873689			0.706667	0.00550757
1260			0.092333	0.00208167			0.094	0.00888819			0.706333	0.00321455
1270			0.093667	0.00321455			0.101667	0.0126623			0.707333	0.00493288
1280			0.093667	0.00288675			0.0973333	0.0107858			0.705	0.00360555
1290			0.092667	0.00472582			0.0953333	0.0110604			0.708667	0.00288675
1300			0.091333	0.00057735			0.0943333	0.0126623			0.709333	0.00472582
1310			0.092333	0.00208167			0.0953333	0.0090185			0.709	0.00264575
1320			0.092333	0.00057735			0.0946667	0.0105987			0.711667	0.00550757
1330			0.089667	0.00472582			0.0963333	0.0110604			0.707667	0.00416333
1340			0.093333	0.00321455			0.0923333	0.0110151			0.709333	0.00416333
1350			0.091	0.00458258			0.0946667	0.0119304			0.710333	0.0023094
1360			0.094333	0.00404145			0.0963333	0.00873689			0.710333	0.0051316
1370			0.090667	0.0023094			0.0976667	0.012897			0.710333	0.00305505
1380			0.094333	0.00472582			0.0976667	0.0110604			0.712667	0.00208167
1390			0.094	0.00173205			0.0946667	0.0134288			0.707667	0.00152753
1400			0.093	0.00264575			0.093	0.011			0.712667	0.00251661
1410			0.094	0.003			0.098	0.00953939			0.711667	0.00568624
1420			0.094	0			0.0983333	0.0125033			0.713	0.00264575
1430			0.092667	0.00378594			0.0956667	0.00950439			0.711667	0.00416333
1440			0.094333	0.00416333			0.0956667	0.0090185			0.712667	0.00378594
1450			0.096333	0.00208167			0.0926667	0.00971253			0.712333	0.0051316
1460			0.091	0.00264575			0.0946667	0.0130128			0.711667	0.00288675
1470			0.09	0			0.0946667	0.0112398			0.712667	0.00602771
1480			0.092	0.002			0.0963333	0.0106927			0.716333	0.00378594
1490			0.095	0.001			0.0966667	0.0100167			0.710667	0.0051316
1500			0.090333	0.00208167			0.096	0.00984886			0.714	0.0034641
1510			0.090333	0.0023094			0.0953333	0.0110604			0.714333	0.00378594
1520			0.094333	0.00251661			0.0946667	0.0100167			0.714333	0.00416333
1530			0.094667	0.00208167			0.0986667	0.0090185			0.712	0.00519615
1540			0.093	0.002			0.0986667	0.0105987			0.715	0.00519615
1550			0.095333	0.00152753			0.095	0.00953939			0.715	0.00264575
1560			0.095667	0.00321455			0.0963333	0.0120968			0.715667	0.0057735
1570			0.093667	0.0011547			0.0976667	0.00960902			0.716333	0.00378594
1580			0.092	0.0043589			0.097	0.00953939			0.715	0.00608276
1590			0.089667	0.00251661			0.096	0.011			0.713333	0.0011547
1600			0.094	0.00264575			0.094	0.0111355			0.716	0.007
1610			0.097667	0.00321455			0.0946667	0.0105987			0.717333	0.00650641
1620			0.094333	0.00251661			0.0953333	0.00971253			0.716	0.00556776
1630			0.095667	0.00208167			0.0966667	0.00986577			0.717	0.00519615
1640			0.095	0.0034641			0.094	0.0101489			0.714333	0.00208167
1650			0.100667	0.0011547			0.0953333	0.0130512			0.715667	0.00585947
1660			0.094	0.00264575			0.094	0.0121655			0.718	0.00519615
1670			0.094333	0.00152753			0.0953333	0.00971253			0.717333	0.00450925
1680			0.097333	0.00251661			0.0953333	0.0090185			0.716	0.002
1690			0.100667	0.00305505			0.0933333	0.0133167			0.715667	0.0051316
1700			0.096333	0.00057735			0.0946667	0.00896289			0.716	0.00556776
1710			0.097	0.00264575			0.092	0.008			0.715667	0.00416333
1720			0.098667	0.00305505			0.0903333	0.0070946			0.715333	0.0064291
1730			0.096667	0.00351189			0.0976667	0.00960902			0.715667	0.0051316
1740			0.097	0.0034641			0.091	0.0111355			0.718667	0.00450925
1750			0.096333	0.00251661			0.092	0.00754983			0.716333	0.00305505
1760			0.098	0.00173205			0.0933333	0.0111505			0.716667	0.00404145
1770			0.099333	0.00208167			0.095	0.00888819			0.719333	0.00404145
1780			0.097333	0.00416333			0.092	0.0137477			0.717333	0.0064291
1790			0.097	0.00264575			0.092	0.008544			0.720667	0.00493288
1800			0.096	0.003			0.096	0.0117898			0.718333	0.00472582
1810			0.097667	0.0011547			0.0913333	0.00862168			0.719	0.00655744
1820			0.099333	0.00251661			0.093	0.0105357			0.716	0.00458258
1830			0.097667	0.00321455			0.0923333	0.00763763			0.718667	0.00665833
1840			0.098	0.001			0.0953333	0.0111505			0.721667	0.00776745
1850			0.101667	0.00404145			0.091	0.006245			0.717667	0.00404145
1860			0.095667	0.00208167			0.0936667	0.0102144			0.720667	0.00680686
1870			0.096	0.003			0.1	0.0137477			0.718	0.00984886
1880			0.100667	0.00450925			0.101333	0.0137961			0.718667	0.00680686
1890			0.098667	0.00450925			0.0896667	0.00907377			0.721333	0.00351189
1900			0.100333	0.00321455			0.0976667	0.0117189			0.720667	0.0057735
1910			0.1	0.00360555			0.0856667	0.00757188			0.722667	0.00650641
1920			0.099	0.002			0.0933333	0.0109697			0.722333	0.00568624
1930			0.097333	0.0023094			0.0936667	0.0115902			0.723	0.0043589
1940			0.098333	0.0023094			0.0963333	0.00907377			0.722	0.00458258
1950			0.096333	0.00321455			0.0976667	0.0102632			0.719667	0.0061101
1960			0.095333	0.00305505			0.0993333	0.0119304			0.722333	0.0061101
1970			0.102	0.002			0.0976667	0.0134288			0.719667	0.0057735
1980			0.099333	0.00351189			0.099	0.0144222			0.720333	0.00723418
1990			0.102	0.0034641			0.0966667	0.0102632			0.719	0.0043589
2000			0.097667	0.00305505			0.1	0.0145258			0.724667	0.00493288
2010			0.101333	0.00305505			0.0976667	0.0112398			0.721667	0.00680686
2020			0.100333	0.00416333			0.100667	0.0110604			0.721333	0.00635085
2030			0.099	0.0043589			0.100667	0.0119304			0.724667	0.0070946
2040			0.101	0.002			0.103333	0.0130128			0.725	0.007
2050			0.102333	0.00305505			0.101	0.01253			0.723333	0.0064291
2060			0.099667	0.00493288			0.0993333	0.0130512			0.719333	0.00550757
2070			0.096667	0.00351189			0.101	0.0115326			0.721	0.006
2080			0.099667	0.00378594			0.101667	0.0109697			0.722333	0.00568624
2090			0.097667	0.00568624			0.103333	0.0126623			0.719333	0.00568624
2100			0.103	0.001			0.102333	0.0155027			0.725667	0.00665833
2110			0.099667	0.00057735			0.101333	0.0116762			0.721	0.00818535
2120			0.097333	0.00416333			0.101667	0.0125033			0.723	0.0043589
2130			0.100333	0.00321455			0.105333	0.0135031			0.722667	0.0080829
2140			0.104	0.00458258			0.106333	0.0150444			0.726667	0.00665833
2150			0.102667	0.00251661			0.108667	0.0150111			0.723667	0.0070946
2160			0.105333	0.00416333			0.102333	0.0125033			0.724667	0.0057735
2170			0.103667	0.00450925			0.104	0.0137477			0.726	0.0052915
2180			0.104333	0.00321455			0.106333	0.0111505			0.724333	0.00896289
2190			0.099333	0.00602771			0.105667	0.0136137			0.724	0.007
2200			0.103	0.0043589			0.106	0.0134536			0.725	0.00458258
2210			0.103667	0.00057735			0.104	0.013			0.724333	0.00907377
2220			0.101667	0.00321455			0.107333	0.0116762			0.722333	0.0090185
2230			0.104333	0.00288675			0.106333	0.0135031			0.725333	0.00814453
2240			0.104333	0.00152753			0.108667	0.0170098			0.725	0.00754983
2250			0.101667	0.00378594			0.109	0.0150997			0.726	0.00984886
2260			0.107333	0.00450925			0.111333	0.0155671			0.721	0.007
2270			0.106667	0.00152753			0.113667	0.0161658			0.726	0.0087178
2280			0.107667	0.00305505			0.111667	0.0161658			0.725333	0.0115902
2290			0.1	0.00458258			0.111	0.017			0.726667	0.00550757
2300			0.103333	0.00472582			0.112333	0.0152753			0.727333	0.00665833
2310			0.104	0.003			0.114333	0.0130128			0.725667	0.00907377
2320			0.108333	0.00152753			0.112333	0.0185562			0.723	0.0108167
2330			0.105	0.00264575			0.117333	0.0170098			0.727667	0.0123423
2340			0.103667	0.00305505			0.116667	0.0155671			0.728667	0.0080829
2350			0.105	0.00264575			0.118	0.0165227			0.726	0.008544
2360			0.106667	0.00472582			0.118333	0.016563			0.725333	0.00907377
2370			0.106	0.00173205			0.12	0.014			0.725667	0.00750555
2380			0.104667	0.00472582			0.122	0.015			0.723333	0.00832666
2390			0.115333	0.00416333			0.124667	0.016563			0.724333	0.0100167
2400			0.104333	0.00404145			0.126333	0.0175024			0.725	0.007
2410			0.105333	0.00503322			0.125667	0.018037			0.724667	0.0061101
2420			0.109	0.00360555			0.127	0.0145258			0.725333	0.00986577
2430			0.101333	0.00351189			0.128333	0.0165025			0.725	0.00964365
2440			0.105333	0.0046188			0.129667	0.01823			0.725	0.0111355
2450			0.115333	0.00416333			0.131667	0.0196044			0.726667	0.0115902
2460			0.112333	0.00493288			0.131667	0.0215948			0.728667	0.0104083
2470			0.112667	0.00450925			0.134667	0.0185023			0.727667	0.0110604
2480			0.114667	0.00208167			0.14	0.0200749			0.729	0.0115326
2490			0.114	0.00173205			0.139667	0.0215019			0.726667	0.0116762
2500			0.113333	0.00493288			0.142	0.0202978			0.726333	0.0110604
2510			0.111	0.00458258			0.144667	0.0215948			0.726	0.00984886
2520			0.113	0.00556776			0.148667	0.0172434			0.726667	0.0083865
2530			0.114667	0.0023094			0.149333	0.0181475			0.723667	0.00971253
2540			0.11	0.001			0.154	0.0202978			0.724	0.00964365
2550			0.11	0.00360555			0.156333	0.0200333			0.724	0.0111355
2560			0.114333	0.00550757			0.158667	0.0205994			0.725333	0.0115902
2570			0.114667	0.00351189			0.161	0.019			0.726667	0.00750555
2580			0.116	0.00519615			0.159667	0.0160416			0.729	0.00984886
2590			0.113333	0.00321455			0.164667	0.0196044			0.728667	0.0115036
2600			0.113	0.0043589			0.166	0.0193132			0.728	0.0105357
2610			0.111333	0.00585947			0.166667	0.0196044			0.727333	0.00702377
2620			0.117333	0.00251661			0.173667	0.0190351			0.729	0.013
2630			0.110667	0.00208167			0.170333	0.016563			0.729	0.009
2640			0.112	0.0052915			0.176667	0.0175024			0.728667	0.0135031
2650			0.112667	0.0023094			0.179333	0.0190088			0.726667	0.0120139
2660			0.112	0.00173205			0.178	0.0180831			0.726	0.00953939
2670			0.109333	0.00057735			0.184667	0.0159478			0.727667	0.00950439
2680			0.112333	0.00152753			0.187667	0.01823			0.729	0.0135277
2690			0.113	0.001			0.187	0.017			0.728	0.0127671
2700			0.115667	0.0011547			0.189333	0.0148436			0.726667	0.0115902
2710			0.111333	0.00057735			0.193667	0.0159478			0.726333	0.0123423
2720			0.110667	0.00305505			0.191	0.0165227			0.729333	0.010504
2730			0.114333	0.00251661			0.192333	0.0161658			0.726333	0.0115902
2740			0.117667	0.00152753			0.194333	0.0185562			0.729	0.0115326
2750			0.114667	0.00251661			0.194667	0.0170098			0.725667	0.0140119
2760			0.117667	0.00503322			0.196	0.0157162			0.728333	0.0110151
2770			0.114667	0.00208167			0.199	0.018			0.727333	0.0105987
2780			0.114	0.00264575			0.200667	0.0142945			0.73	0.013
2790			0.114667	0.00208167			0.202333	0.0141892			0.729667	0.0140475
2800			0.114667	0.00378594			0.204667	0.0145029			0.725667	0.0133167
2810			0.116333	0.0011547			0.204	0.01253			0.728667	0.0135031
2820			0.106	0.0043589			0.207	0.0141067			0.727	0.012
2830			0.112667	0.0011547			0.206667	0.0135031			0.725	0.015
2840			0.115667	0.00057735			0.207	0.0121244			0.729	0.00916515
2850			0.114667	0.00057735			0.209333	0.0130128			0.728333	0.0140119
2860			0.119667	0.00404145			0.211	0.011			0.729333	0.0125831
2870			0.112667	0.00208167			0.206667	0.0125033			0.726667	0.0155671
2880			0.113667	0.00152753			0.211	0.0115326			0.728667	0.0125033
2890			0.112	0.00173205			0.212	0.01253			0.727333	0.0142945
2900			0.118333	0.00152753			0.214	0.013			0.729667	0.0110604
2910			0.114667	0.0023094			0.211667	0.0150444			0.728	0.014
2920			0.113667	0.00288675			0.217667	0.0122202			0.726667	0.0115036
2930			0.114667	0.00057735			0.213667	0.00907377			0.726333	0.0115902
2940			0.111333	0.0011547			0.215667	0.0132035			0.727333	0.0115902
2950			0.113333	0.00152753			0.218667	0.0122202			0.726	0.013
2960			0.113333	0.00057735			0.217333	0.0110151			0.727	0.01249
2970			0.119333	0.00152753			0.219	0.0101489			0.726667	0.0135031
2980			0.117	0.001			0.216333	0.0100664			0.727667	0.010504
2990			0.116667	0.0011547			0.216333	0.00950439			0.724667	0.0115902
3000			0.113333	0.00450925			0.220333	0.00750555			0.728	0.0105357
3010			0.119333	0.00416333			0.221667	0.0125033			0.728667	0.0122202
3020			0.118	0.001			0.22	0.0108167			0.727333	0.0110604
3030			0.115333	0.00057735			0.219	0.00754983			0.728667	0.0140475
3040			0.117667	0.0011547			0.217667	0.00950439			0.728	0.018
3050			0.115	0.001			0.223	0.0111355			0.724667	0.0125033
3060			0.118333	0.00208167			0.219667	0.0120139			0.728333	0.0120968
3070			0.122	0.001			0.221	0.007			0.722	0.0150997
3080			0.120333	0.00152753			0.221333	0.00945163			0.726667	0.0145717
3090			0.118	0.001			0.219667	0.00702377			0.725	0.0155242
3100			0.121667	0.00152753			0.225333	0.0085049			0.728333	0.0133167
3110			0.120667	0.00208167			0.224	0.00984886			0.726333	0.0140475
3120			0.118	0.0034641			0.222	0.00984886			0.725333	0.0140119
3130			0.117667	0.00152753			0.223333	0.0080829			0.728667	0.0130128
3140			0.119333	0.00152753			0.220333	0.0109697			0.726667	0.0130128
3150			0.121	0.00264575			0.222	0.0112694			0.724	0.01249
3160			0.119333	0.00152753			0.224667	0.00763763			0.723667	0.0130128
3170			0.118333	0.00057735			0.226	0.00916515			0.727667	0.010504
3180			0.120667	0.00351189			0.226333	0.00907377			0.724333	0.0125831
3190			0.121	0.00173205			0.227	0.00984886			0.726333	0.0125831
3200			0.123667	0.0011547			0.226	0.00655744			0.725667	0.0100167
3210			0.124333	0.00251661			0.225333	0.0080829			0.726667	0.0125831
3220			0.123	0.00173205			0.225	0.009			0.723667	0.0145717
3230			0.124	0.00264575			0.225333	0.0100167			0.726667	0.0126623
3240			0.122	0.00264575			0.229333	0.00776745			0.722667	0.0130512
3250			0.121	0.001			0.228667	0.00862168			0.725333	0.0115036
3260			0.120667	0.0011547			0.228333	0.00945163			0.727	0.01
3270			0.120333	0.0023094			0.227333	0.0061101			0.724	0.011
3280			0.111333	0.00288675			0.227333	0.0085049			0.724	0.013
3290			0.122667	0.00208167			0.227	0.00916515			0.722667	0.0145029
3300			0.122	0.0052915			0.225333	0.00750555			0.728	0.00916515
3310			0.123333	0.00321455			0.232667	0.00602771			0.726333	0.0150111
3320			0.125667	0.00152753			0.229333	0.0110151			0.726	0.0111355
3330			0.120667	0.00208167			0.229667	0.00862168			0.724667	0.0136504
3340			0.124	0.001			0.228667	0.00832666			0.725	0.0111355
3350			0.122	0.001			0.228667	0.0064291			0.724333	0.0130128
3360			0.122333	0.00152753			0.231	0.00866025			0.725667	0.0115036
3370			0.125333	0.00321455			0.23	0.00655744			0.721333	0.0110151
3380			0.127	0.001			0.229333	0.0051316			0.722667	0.0135031
3390			0.126333	0.0011547			0.227333	0.00945163			0.724667	0.0116762
3400			0.128333	0.00351189			0.229333	0.00929157			0.725	0.0135277
3410			0.126	0.004			0.229333	0.0085049			0.724	0.0155242
3420			0.128333	0.00057735			0.229333	0.00702377			0.724	0.0135277
3430			0.127333	0.00288675			0.231667	0.00665833			0.721667	0.0130512
3440			0.127	0.00264575			0.227333	0.0102144			0.72	0.011
3450			0.124	0.001			0.229667	0.00665833			0.724667	0.0140475
3460			0.129667	0.00208167			0.231667	0.00929157			0.723	0.0157162
3470			0.128	0.001			0.231667	0.00737112			0.722667	0.0110151
3480			0.125333	0.00057735			0.228333	0.00585947			0.722333	0.0140475
3490			0.128333	0.00305505			0.228667	0.00832666			0.720667	0.0150444
3500			0.126333	0.00152753			0.23	0.00793725			0.723667	0.0145029
3510			0.125	0.001			0.231	0.00458258			0.721333	0.0125831
3520			0.129	0.003			0.227333	0.00750555			0.725333	0.0115902
3530			0.128	0.00173205			0.230333	0.010116			0.722	0.0145258
3540			0.128	0			0.226667	0.00723418			0.720667	0.0106927
3550			0.128333	0.00152753			0.234333	0.0085049			0.722667	0.0162583
3560			0.128333	0.00152753			0.23	0.00608276			0.719	0.0150997
3570			0.128	0.00264575			0.229333	0.00971253			0.721333	0.0135769
3580			0.130333	0.00152753			0.227333	0.00585947			0.721667	0.00950439
3590			0.129	0.00264575			0.231	0.0052915			0.720333	0.0120139
3600			0.127333	0.00057735			0.228333	0.00321455			0.721	0.013
3610			0.128	0.00173205			0.227667	0.00763763			0.721333	0.0122202
3620			0.128667	0.00057735			0.230333	0.0083865			0.719667	0.0120139
3630			0.128	0.001			0.226333	0.00321455			0.720667	0.0140119
3640			0.132	0.002			0.228333	0.00351189			0.720333	0.0135031
3650			0.134333	0.00152753			0.228	0.0043589			0.723	0.0117898
3660			0.13	0.002			0.231667	0.00503322			0.720667	0.0133167
3670			0.134	0.001			0.229667	0.00776745			0.722333	0.0135769
3680			0.133667	0.0011547			0.23	0.00793725			0.721667	0.0135031
3690			0.130333	0.00251661			0.232333	0.0083865			0.722	0.0121244
3700			0.128667	0.00152753			0.232333	0.00550757			0.722333	0.0100167
3710			0.131667	0.00568624			0.231333	0.00404145			0.719667	0.0155027
3720			0.134333	0.0011547			0.229667	0.00493288			0.723667	0.0140475
3730			0.134667	0.00251661			0.231667	0.0061101			0.723333	0.0135031
3740			0.133	0.003			0.232	0.004			0.718333	0.0116762
3750			0.136667	0.0023094			0.23	0.007			0.720667	0.0145717
3760			0.135	0.00173205			0.232667	0.00550757			0.719	0.0121244
3770			0.134667	0.00305505			0.230667	0.00568624			0.723667	0.0116762
3780			0.136333	0.00152753			0.233	0.0087178			0.719	0.0115326
3790			0.133667	0.00305505			0.236	0.0115326			0.722333	0.0120139
3800			0.138333	0.00305505			0.242	0.0131149			0.723667	0.00907377
3810			0.135333	0.00321455			0.235	0.006245			0.72	0.00953939
3820			0.136333	0.0011547			0.235667	0.00981496			0.718667	0.0120554
3830			0.134333	0.00404145			0.229	0.0052915			0.720667	0.0115036
3840			0.138667	0.00152753			0.229667	0.00472582			0.721	0.0147309
3850			0.140667	0.00680686			0.232667	0.00986577			0.721667	0.0110604
3860			0.133667	0.00416333			0.227667	0.00550757			0.718333	0.0135031
3870			0.139333	0.00378594			0.233667	0.0080829			0.717333	0.0126623
3880			0.140333	0.00378594			0.235	0.00781025			0.718667	0.0120554
3890			0.136333	0.00503322			0.233	0.0087178			0.715667	0.0136504
3900			0.135	0.0052915			0.230333	0.00450925			0.719667	0.0116762
3910			0.136	0.00519615			0.235333	0.0100167			0.719667	0.0133167
3920			0.139333	0.00208167			0.243333	0.0113725			0.715667	0.0120554
3930			0.133667	0.00288675			0.230667	0.0051316			0.718667	0.0120139
3940			0.132667	0.00472582			0.237667	0.00665833			0.716	0.011
3950			0.142333	0.0011547			0.239667	0.00568624			0.716667	0.0133167
3960			0.140667	0.00665833			0.233	0.0052915			0.719333	0.0115902
3970			0.137667	0.00404145			0.234667	0.00702377			0.716333	0.0100167
3980			0.138333	0.00404145			0.236	0.00458258			0.717667	0.010504
3990			0.139667	0.00057735			0.233333	0.00680686			0.716	0.0112694
4000			0.141333	0.00351189			0.237667	0.00635085			0.716667	0.0100664
4010			0.138	0.0034641			0.237667	0.00665833			0.718333	0.0151767
4020			0.140667	0.00288675			0.237	0.00655744			0.717667	0.0106927
4030			0.141	0.001			0.251	0.0115326			0.719	0.0111355
4040			0.14	0.00360555			0.239667	0.0080829			0.724	0.00916515
4050			0.142667	0.00152753			0.242333	0.00802081			0.721333	0.0105987
4060			0.140333	0.00493288			0.239333	0.00416333			0.715667	0.0130512
4070			0.145	0.00519615			0.238667	0.00832666			0.719333	0.0125831
4080			0.144667	0.00404145			0.242333	0.00665833			0.717333	0.0145717
4090			0.141667	0.00404145			0.241	0.00655744			0.719	0.0135277
4100			0.147	0.0043589			0.239333	0.00750555			0.716	0.0111355
4110			0.145333	0.00416333			0.242	0.0087178			0.715667	0.0130128
4120			0.144333	0.00152753			0.243	0.00781025			0.716	0.0144222
4130			0.147333	0.0023094			0.243667	0.00503322			0.717333	0.0085049
4140			0.149	0.00360555			0.246	0.0052915			0.716	0.0137477
4150			0.148	0.002			0.242333	0.00378594			0.717	0.0141067
4160			0.15	0.00360555			0.241333	0.00450925			0.716	0.00964365
4170			0.157	0.003			0.241333	0.00208167			0.719667	0.0123423
4180			0.149	0.00173205			0.244	0.00754983			0.716333	0.00650641
4190			0.149667	0.00251661			0.246333	0.00351189			0.721	0.00964365
4200			0.151	0.0034641			0.245	0.00608276			0.718333	0.00907377
4210			0.152333	0.00208167			0.247333	0.0064291			0.715333	0.0120554
4220			0.154333	0.0011547			0.256	0.0101489			0.714667	0.0146401
4230			0.152667	0.00057735			0.258333	0.0120554			0.717667	0.0110151
4240			0.163667	0.00152753			0.257667	0.0110151			0.716	0.0105357
4250			0.157667	0.00251661			0.258667	0.00702377			0.716333	0.00832666
4260			0.156333	0.0023094			0.251	0.0072111			0.718333	0.0105987
4270			0.156	0.00360555			0.251333	0.00550757			0.715667	0.00907377
4280			0.157667	0.0023094			0.251667	0.00723418			0.716333	0.00907377
4290			0.155	0.00264575			0.253	0.0072111			0.713333	0.0090185
4300			0.156	0.001			0.250333	0.0085049			0.713333	0.0117189
4310			0.159	0.00264575			0.249667	0.00568624			0.716667	0.0102144
4320			0.159667	0.00057735			0.251333	0.00321455			0.716667	0.0113725
4330			0.156667	0.0011547			0.25	0.00360555			0.715667	0.0105987
4340			0.155	0.00173205			0.251	0.002			0.714	0.012
4350			0.155667	0.00321455			0.249667	0.0046188			0.717667	0.010504
4360			0.157	0.001			0.253	0.003			0.715333	0.0125831
4370			0.157333	0.00416333			0.252333	0.00568624			0.715	0.013
4380			0.153333	0.0051316			0.255667	0.00702377			0.711333	0.0125831
4390			0.157333	0.00208167			0.260667	0.00351189			0.716333	0.00862168
4400			0.158333	0.00057735			0.264333	0.0070946			0.714667	0.0100167
4410			0.160333	0.0011547			0.262667	0.0120139			0.716	0.0115326
4420			0.159	0.002			0.266	0.0072111			0.713333	0.010504
4430			0.157667	0.00057735			0.261667	0.00568624			0.713667	0.0102144
4440			0.163	0.001			0.263333	0.00493288			0.713667	0.00950439
4450			0.158667	0.00288675			0.264	0.007			0.710667	0.0106927
4460			0.159	0.001			0.263667	0.00568624			0.710333	0.0090185
4470			0.162	0.004			0.263667	0.00568624			0.711667	0.00971253
4480			0.160333	0.00305505			0.262667	0.00550757			0.712333	0.0130128
4490			0.159	0.00264575			0.262	0.0052915			0.708	0.0127671
4500			0.167	0.00173205			0.264667	0.00351189			0.713333	0.0112398
4510			0.166333	0.00152753			0.265333	0.00152753			0.709	0.0115326
4520			0.159667	0.00404145			0.267667	0.00568624			0.709333	0.0122202
4530			0.159333	0.0023094			0.267667	0.00723418			0.708	0.0130767
4540			0.168667	0.00321455			0.269	0.006			0.708	0.013
4550			0.166667	0.00493288			0.267333	0.00152753			0.709333	0.0155349
4560			0.157667	0.00378594			0.265667	0.00404145			0.712	0.0134536
4570			0.161333	0.00378594			0.268333	0.0051316			0.71	0.01249
4580			0.159667	0.00288675			0.267667	0.00702377			0.711	0.0105357
4590			0.161333	0.00321455			0.267667	0.00550757			0.710667	0.0135031
4600			0.167	0.00173205			0.273333	0.00493288			0.706333	0.016563
4610			0.165	0.00264575			0.268667	0.00404145			0.706	0.0137477
4620			0.166667	0.00208167			0.268333	0.00585947			0.710667	0.0147422
4630			0.168667	0.00057735			0.27	0.0052915			0.707	0.0137477
4640			0.166333	0.0011547			0.267	0.00360555			0.708667	0.0146401
4650			0.168333	0.00152753			0.269667	0.00550757			0.706	0.0127671
4660			0.166	0.00264575			0.269	0.007			0.708	0.0141774
4670			0.169667	0.0023094			0.269667	0.00635085			0.708667	0.0120554
4680			0.167	0.00360555			0.269333	0.0070946			0.709	0.0135277
4690			0.17	0.001			0.269	0.00264575			0.707	0.0147309
4700			0.166667	0.00378594			0.27	0.00655744			0.709	0.0145258
4710			0.169667	0.0011547			0.268333	0.00404145			0.705333	0.0132035
4720			0.170667	0.00057735			0.27	0.00264575			0.708333	0.0125033
4730			0.17	0.003			0.268333	0.00351189			0.708333	0.0136137
4740			0.166333	0.00208167			0.270667	0.00450925			0.710333	0.0125831
4750			0.170667	0.00305505			0.270667	0.00503322			0.705333	0.0110151
4760			0.172	0.001			0.271333	0.00404145			0.705333	0.0117189
4770			0.168667	0.00305505			0.271333	0.00416333			0.707667	0.015695
4780			0.170333	0.00208167			0.267667	0.00503322			0.708333	0.0145717
4790			0.168333	0.00057735			0.269333	0.00404145			0.707667	0.0155671
4800			0.173333	0.00251661			0.268333	0.00493288			0.704333	0.0155671
4810			0.171333	0.00321455			0.267333	0.00251661			0.703333	0.0126623
4820			0.168	3.39935e-17			0.272	0.0052915			0.702667	0.0102144
4830			0.170333	0.00152753			0.269667	0.00404145			0.705667	0.0166533
4840			0.169667	0.00305505			0.269	0.006			0.706667	0.0130512
4850			0.170333	0.00404145			0.271	0.00264575			0.706	0.01253
4860			0.171	0.002			0.273667	0.00723418			0.707	0.0137477
4870			0.17	0.001			0.271	0.00173205			0.703	0.0134536
4880			0.169333	0.00450925			0.272667	0.00404145			0.701333	0.0100664
4890			0.171333	0.00251661			0.272667	0.00378594			0.704	0.0122882
4900			0.171333	0.00378594			0.270667	0.00450925			0.704	0.011
4910			0.172	0.00264575			0.268333	0.00493288			0.702333	0.0102632
4920			0.171667	0.00305505			0.270667	0.00472582			0.7	0.0121244
4930			0.166	0.00556776			0.27	0.00264575			0.705333	0.0133167
4940			0.166333	0.00321455			0.271	0.004			0.699667	0.0126623
4950			0.168667	0.00550757			0.272	0.0034641			0.702333	0.0138684
4960			0.17	0.00264575			0.273333	0.0011547			0.705	0.0144222
4970			0.172667	0.00057735			0.268667	0.00404145			0.703667	0.0125033
4980			0.174667	0.00305505			0.271667	0.00568624			0.7	0.0141067
4990			0.166	0.00264575			0.269667	0.00378594			0.703333	0.0115902
5000			0.175	0.001			0.268333	0.00321455			0.702667	0.0140475

[truncated: 31 more sheets: Figure 5C, Figure 5D, Figure 6A, Figure 6C, Figure 6D, Supple Fig 1B, Supple Fig 1C, Supple Fig 4, Supple Fig 5A, Supple FIg 5B, Supple Fig 6A, Supple Fig 6B, Supple Fig S6C, Supple Fig S6D, Supple Fig S7A, Supple Fig S7B, Supple Fig S10A, Supple S10B, Supple S10C, Supple S10D …]
